# Supplementary material
Source: Springer Nature journal article supplement (https://www.springermedizin.de/resource/supplementary/12967_2011_846_MOESM3_ESM.pdf/9577192)

# Exercise Capacity

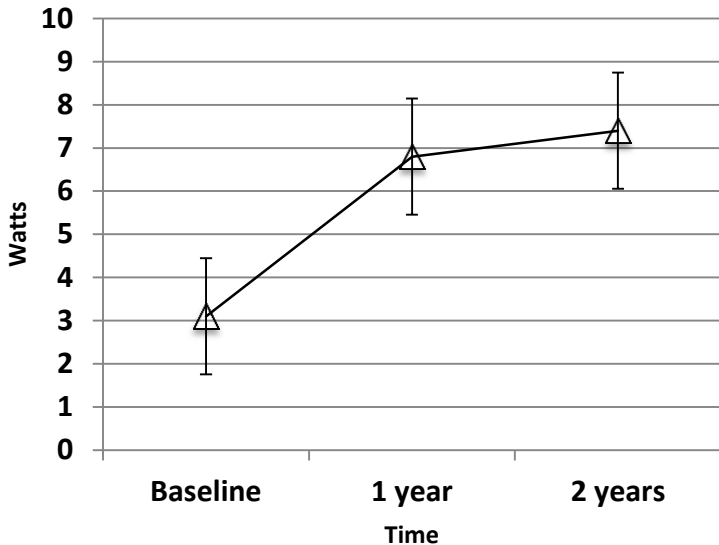

Supplement: MOESM3 [file 9577192]
